# Supplementary material for: Advancing neurosurgical education in the age of online learning and global knowledge sharing: impact of Cerebrovascular Q&A webinar series
Source: Frontiers journal article supplement (doi:10.3389/fsurg.2023.1274954), 2023-11-30
Supplement: Data_Sheet_1.PDF [file Data_Sheet_1.PDF]

**Table 1 : Chronological list of topics covered in the Cerebrovascular Q&A webinar series, along with the list of speakers.**

| <b>Sr No</b> | <b>Video : Topic &amp; Speaker</b>                                                               | <b>Release date</b> |
|--------------|--------------------------------------------------------------------------------------------------|---------------------|
| 1            | Cerebrovascular Q&A: Revascularization for Moyamoya Disease- Bi Xu, M.D.                         | Oct 29, 2021        |
| 2            | CV Q&A- The Art of Flow Diversion- Pedro Lylyk, M.D.                                             | Dec 11, 2021        |
| 3            | Dural AVF's With PIAL Supply - Timo Krings, MD                                                   | Jan 12, 2022        |
| 4            | Skull Base Armamentarium for the Cerebrovascular Neurosurgeon - Vinko Dolenc, M.D.               | Nov 12, 2021        |
| 5            | ECA Dangerous Anastomosis: Key Anatomy and Clinical Cases                                        | Oct 14, 2021        |
| 6            | Aneurysms, Surgical & Clipology - Juha Hernesniemi                                               | Oct 1, 2021         |
| 7            | VR/AR in Cerebrovascular Neurosurgery - Walter Jean, MD                                          | Jan 26, 2022        |
| 8            | WEB Aneurysm Treatments - Laurent Pierot, MD                                                     | Feb 10, 2022        |
| 9            | eShunt: The Next Revolution in Hydrocephalus Treatment? - Adel Malek, M.D.                       | Feb 23, 2022        |
| 10           | Vessel Wall Imaging in Cerebrovascular Neurosurgery – Mahmud Mossa-Basha, M.D.                   | Mar 10, 2022        |
| 11           | From Anatomy to Pathology: The Power of Imaging – Eytan Raz, M.D.                                | Mar 23, 2022        |
| 12           | Super Selective Transvenous dAVF Embolization – Maksim Shapiro, M.D.                             | Apr 13, 2022        |
| 13           | Glymphatic System: Implications for Cerebrovascular Neurosurgery – Iype Cherian, M.D.            | Apr 27, 2022        |
| 14           | CSF-Venous Fistulas: A New Endovascular Frontier - Waleed Brijinkji, M.D.                        | May 11, 2022        |
| 15           | Novel Insights in Imaging and Treatment of Brain AVM's – Timo Krings, M.D.                       | May 25, 2022        |
| 16           | WEB Aneurysm Treatment: Results of Prospective Studies - Laurent Pierot, MD                      | Jun 8, 2022         |
| 17           | Epidural Vascular Malformations of the Spine - Giuseppe Lanzino, M.D                             | Jun 22, 2022        |
| 18           | Functional Vascular Anatomy of The Spine & Spinal Cord – Masaki Komiyama, M.D.                   | Jul 13, 2022        |
| 19           | Revascularization for Intracranial Atherosclerotic Steno-Occlusive Disease - Nestor Gonzalez, MD | Jul 27, 2022        |
| 20           | Perfusion Imaging in Cerebrovascular Ischemia – Jeremy Heit, M.D., Ph.D                          | Aug 24, 2022        |
| 21           | When Patients Comes First: Choosing Access Site for the Best Thrombectomy Set Up– Elad Levy, M.D | Sep 14, 2022        |
| 22           | Robotics in Neurovascular Surgery – Stavropoula Tjoumakaris, M.D                                 | Sep 29, 2022        |
| 23           | Super-Subspecialization in Neurosurgery: The Vascular Paradigm - Pascal Jabbour, M.D.            | Oct 12, 2022        |
| 24           | Treatment of Giant Aneurysms: State of the Art - Ricardo Hanel, M.D., Ph.D.                      | Oct 26, 2022        |
| 25           | Curiosity, A Calling to Research – J. Mocco, M.D.                                                | Nov 9, 2022         |

|    |                                                                                                      |                |
|----|------------------------------------------------------------------------------------------------------|----------------|
| 26 | Tandem Occlusions: Current Evidence and Next Steps - Santiago Ortega-Gutierrez, MD                   | Nov 23, 2022   |
| 27 | Decision Making in Surgical Treatment of Intracranial Aneurysms in the Endovascular Era              | Dec 14, 2022   |
| 28 | Surgery to Endovascular Therapy, New Hybrid Approaches: Carotid Cavernous Fistulas - Peter Kan, M.D. | Jan 11, 2023   |
| 29 | Venous Stenting For IIH And Pulsatile Tinnitus - Vitor Pereira, M.D                                  | Jan 25, 2023   |
| 30 | Remote Robotic Neuro-Intervention: In Vitro and Computational Simulations - Satoshi Tateshima, M.D   | Feb 8, 2023    |
| 31 | A Lifetime Into Cavernomas: Lessons Learned - Issam Awad, M.D., MSc, FACS, MA                        | Feb 22, 2023   |
| 32 | Curative Embolization of Cerebral AVMs - Dr. med René Chapot                                         | Mar 8, 2023    |
| 33 | High Resolution Intravascular Imaging of The Cerebrovasculature - Matthew Gounis, Ph.D               | March 22, 2023 |
| 34 | The Future of Cerebrovascular Surgery - Dr Gary Steinberg                                            | April 12, 2023 |
| 35 | Flow diversion and Beyond. Ajay Wakhloo                                                              | May 10, 2023   |
| 36 | Endovascular Management of Chronic Subdural Hemorrhage - David Fiorella, MD                          | May 24, 2023   |
| 37 | Endovascular Management of Acute Stroke – Santiago Ortega-Gutierrez, M.D                             | June 14, 2023  |
| 38 | Biplane Angiography into the Intraoperative Setting - Jan-Karl Burkhardt, MD                         | June 28, 2023  |
| 39 | Endovascular therapy for stroke. Current status and future directions - Tudor Jovin, MD              | July 12, 2023  |
| 40 | Neurosurgical Artificial Intelligence: Opportunities and Challenges – Daniel Donoho, MD              | July 26, 2023  |

**Survey Questions/Questionnaire:**

1. What country do you live in?
2. If living in the United States, which state do you reside in?
3. In what year were you born?
4. What is your gender?
  - ☐ Male
  - ☐ Female
  - ☐ Prefer not to say
5. What phase of education/training/practice are you currently in?
  - ☐ College
  - ☐ Medical school
  - ☐ Medical residency
  - ☐ Fellowship: Radiology
  - ☐ Fellowship: Neurology
  - ☐ Fellowship: Neurosurgery
  - ☐ Attending: neurointerventional radiology
  - ☐ Attending: Neurointerventional neurology
  - ☐ Attending: neurointerventional neurosurgery
  - ☐ Other (please specify)
6. Where do you usually watch the Q&A webinars?
  - ☐ Zoom live streaming
  - ☐ YouTube live streaming
  - ☐ YouTube recorded sessions
  - ☐ Other
  - ☐ Other (please specify)
7. How did you hear about this webinar?
  - ☐ Instagram
  - ☐ Facebook
  - ☐ Twitter
  - ☐ YouTube
  - ☐ Seattle Science Foundation Emails
  - ☐ Other (Whatsappgroup, Google search etc)
8. The sessions have allowed me to come up with thought-provoking ideas which can be considered for research projects.
  - ☐ Disagree
  - ☐ Somewhat disagree
  - ☐ Neither agree nor disagree
  - ☐ Somewhat agree
  - ☐ Agree
9. The sessions have allowed me to change at least one aspect of my clinical practice.
  - ☐ Disagree
  - ☐ Somewhat disagree
  - ☐ Neither agree nor disagree
  - ☐ Somewhat agree
  - ☐ Agree

10. The content of the sessions is advanced and comprehensive

- Disagree
- Somewhat disagree
- Neither agree nor disagree
- Somewhat agree
- Agree

11. The speakers invited are:

- Relevant
- Rarely encountered giving lectures in the participant's home Country
- Rarely accessible

12. I look forward to continuing to join future sessions in the series.

- Disagree
- Somewhat disagree
- Neither agree nor disagree
- Somewhat agree
- Agree
